# Supplementary material for: Variations in bacterial diversity and community structure in the sediments of an alkaline lake in Inner Mongolia plateau, China
Source: PeerJ. 2023 Aug 21;11:e15909. doi: 10.7717/peerj.15909 (PMC10448878; doi:10.7717/peerj.15909)
Supplement: Supplemental Information 5 [file peerj-11-15909-s005.xlsx]

## Sheet: Sheet1
pH	1	2	3
S1	7.6	7.8	7.5
S2	9.3	9.5	9.2
S3	9	8.9	8.8
S4	9.4	9.4	9.5
Salinity (‰) (w/w)	1	2	3
S1	15.69	16.42	16.05
S2	49.22	49.01	49.21
S3	21.84	23.78	22.81
S4	41.51	39.73	40.62
WC (%)	1	2	3
S1	25.88	24.71	25.15
S2	39.61	41.75	40.68
S3	15.34	14.7	14.91
S4	19.79	20.46	20.32
TOC (g/kg)	1	2	3
S1	29.48	27.59	28.53
S2	30.61	31.24	30.92
S3	24.04	24.81	24.43
S4	21.6	20.05	20.83
TN (g/kg)	1	2	3
S1	0.78	0.94	0.89
S2	1.31	1.36	1.36
S3	0.63	0.79	0.73
S4	0.84	0.89	0.89
TOC/TN	1	2	3
S1	37.79	29.35	32.06
S2	23.37	22.97	22.74
S3	38.16	31.41	33.47
S4	25.71	22.53	23.4
NO3--N (mg/kg)	1	2	3
S1	0.48	0.34	0.36
S2	3.12	3.23	3.15
S3	1.15	1	1.07
S4	1.78	1.82	1.8
NH4+-N (mg/kg)	1	2	3
S1	3.93	3.44	2.95
S2	1.97	1.47	2.46
S3	2.95	3.44	2.46
S4	1.47	1.97	1.97
Shannon index	1	2	3
S1	6.058	6.046	6.03
S2	4.7318	4.8	4.821
S3	3.724	3.71	3.916
S4	2.719	3.754	3.061
Simpson index (1/D)	1	2	3
S1	151.469	140.095	167.252
S2	53.447	54.945	59.666
S3	8.263	10.467	10.548
S4	6.217	14.15	7.841
Chao1 index	1	2	3
S1	1516.98	1581.05	1532.77
S2	815.75	876.913	819.733
S3	726.943	695.63	816
S4	468	575.459	566.554
ACE index	1	2	3
S1	1517.49	1564.91	1539.88
S2	810.786	834.646	819.388
S3	810.786	834.646	819.388
S4	471.68	567.811	565.135
OTU numbers	1	2	3
S1	1383	1419	1421
S2	1383	1419	1421
S3	563	478	611
S4	359	468	453
Coverage	1	2	3
S1	0.988	0.988	0.991
S2	0.993	0.9918	0.996
S3	0.993	0.9918	0.996
S4	0.995	0.995	0.996
WC, water content; TOC, total organic carbon content; TN, total nitrogen content; TOC/TN, ratio of total organic carbon content to total nitrogen content; NO3--N, nitrate nitrogen content; NH4+-N, ammonium nitrogen content.
